# Supplementary material for: Star-shaped poly(l-lactide)-b-poly(ethylene glycol) with porphyrin core: synthesis, self-assembly, drug-release behavior and singlet oxygen research
Source: Royal Society of Chemistry journal article supplement (doi:10.1039/c3nj01621h), 2014-01-01
Supplement: c3nj01621h1.pdf [file c3nj01621h1.pdf]

## Supporting Information

Xiao-Hui Dai<sup>1\*,2</sup>, Zhi-Ming Wang<sup>1</sup>, Lu-You Gao<sup>1</sup>, Jian-Ming Pan<sup>1\*</sup>, Xiao-Hong

Wang<sup>1</sup>, Yong-Sheng Yan<sup>1,2</sup>, Dong-Ming liu<sup>3</sup>

1. Department of Chemical Engineering, School of Chemistry and Chemical Technology, Jiangsu University, Zhenjiang 212013, P. R. China
2. State Key Laboratory of Natural and Biomimetic Drugs, Peking University, Beijing, 100191, P. R. China
3. Hospital Affiliated to Jiangsu University, Zhenjiang 212013, P. R. China

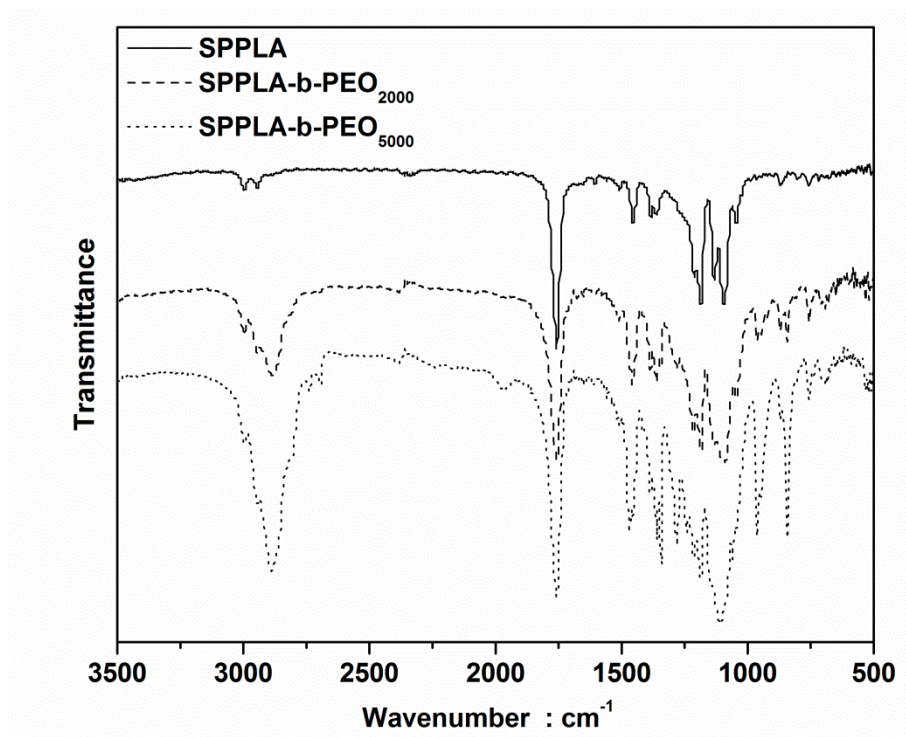

**Figure S1**

Figure S1. FI-IR spectra of pure SPPLA and the SPPLA-b-PEG block copolymers
